# Supplementary material
Source: publisher site journal article supplement (https://www.dovepress.com/article/239910)
Supplement: Supplementary file 1 [file get_supplementary_file.php]

**Surface engineering of metal organic framework as pH/NIR-responsive nanocarrier for imaging-guided chemo-photothermal therapy**

Haibin Guoa, 1, Yanqing Xiaa, 1, Ke Fenga, Xiaowei Qua, Cuilian Zhanga*, Feng Wana*

aHenan Provincial People’s Hospital, Henan Provincial Reproductive Hospital, People's Hospital of Zhengzhou University, People's Hospital of Henan University, Zhengzhou, Henan, 450003, China.

Correspondence:

Feng Wan.

Henan Provincial People’s Hospital, Henan Provincial Reproductive Hospital, People's Hospital of Zhengzhou University, People's Hospital of Henan University, Zhengzhou, Henan, 450003, China.

Tel +86 0371 87160762

Email: fengwanscholar@163.com

1 Contributed equally to this work.

*Corresponding authors


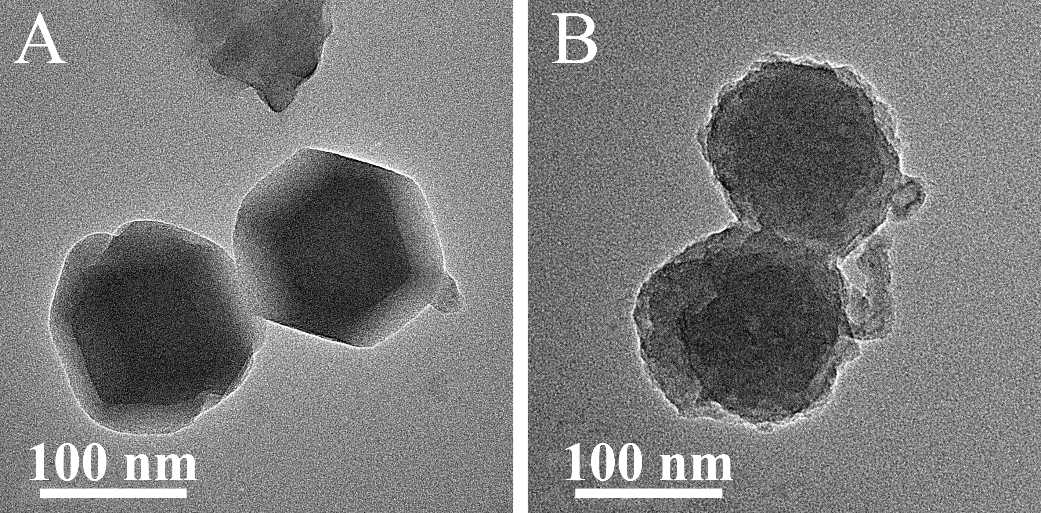


**Fig. S1.** TEM images of (A) ZIF-8 and (B) ZIF-8/MPP without DOX incorporation during the synthetic process.


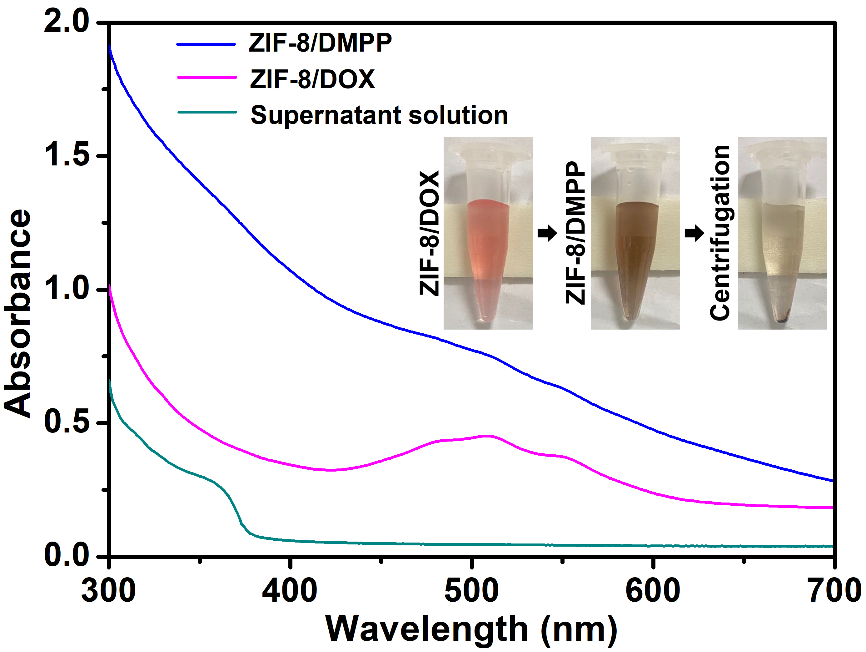


**Fig. S2.** UV-vis spectra of ZIF-8/DOX, ZIF-8/DMPP and supernatant solution of ZIF-8/DMPP after high-speed centrifugation. Inset represents the digital photos of the corresponding samples.





**Fig. S3.** The fluorescent intensity of PC-3 cells incubated with FITC-labelled drug-free ZIF-8/MPP for 2 h with or without NIR laser irradiation (measured by ImageJ software).


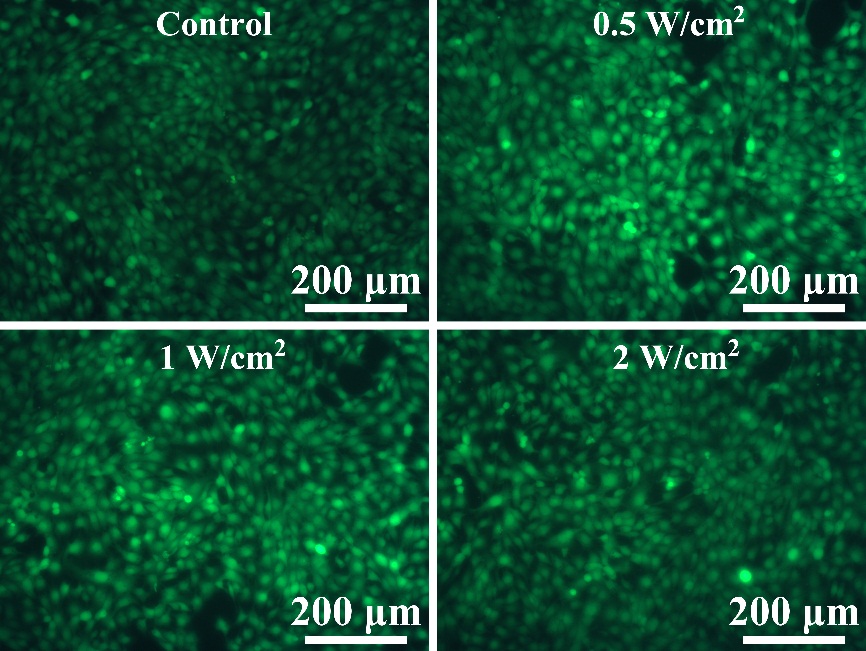


**Fig. S4.** Live-dead staining images of PC-3 cells after exposed to 808 nm laser with different power density.





**Fig. S5.** Cell viability of PC-3 cells and HUVECs incubated with free ZIF-8/MPP for 24 h.
